# Supplementary material
Source: publisher figshare collection journal article supplement (https://future-science-group.figshare.com/ndownloader/files/34326839)
Supplement: Supplementary file 1 [file 34326839]

**Manuscript title:** Investigating underlying human immunity genes, implicated diseases, and their relationship with the COVID-19

**Supplementary material 3:** Common genes-diseases.
